# Supplementary material for: Normative Modeling of Brain Morphometry in Clinical High Risk for Psychosis
Source: PubMed Central journal article supplement (PMC10568447; doi:10.1001/jamapsychiatry.2023.3850), 2023-10-11
Supplement: jamapsychiatry-e233850-s002.pdf [file jamapsychiatry-e233850-s002.pdf]

\*First name, last name, and suffix (if applicable) are required and will appear in PubMed.

| <b>*Group Name(s): ENIGMA Clinical High Risk for Psychosis Working Group</b> |                   |                              |                         |                                                                                                                                              |                                                 |                                                                |                                                                                                   |
|------------------------------------------------------------------------------|-------------------|------------------------------|-------------------------|----------------------------------------------------------------------------------------------------------------------------------------------|-------------------------------------------------|----------------------------------------------------------------|---------------------------------------------------------------------------------------------------|
| <b>*First Name and Middle Initial(s)</b>                                     | <b>*Last Name</b> | <b>*Suffix (eg, Jr, III)</b> | <b>Academic Degrees</b> | <b>Institution</b>                                                                                                                           | <b>Location (city, state/province, country)</b> | <b>Role or Contribution, eg, chair, principal investigator</b> | <b>Group (if more than 1 Group listed in the byline) and/or Subgroup (eg, Steering Committee)</b> |
| Paul                                                                         | Allen             |                              | PhD                     | Department of Psychology, University of Roehampton                                                                                           | London, UK                                      |                                                                |                                                                                                   |
|                                                                              |                   |                              |                         | Department of Psychosis Studies, Institute of Psychiatry, Psychology and Neuroscience, King's College London                                 | London, UK                                      |                                                                |                                                                                                   |
| Helen                                                                        | Baldwin           |                              | MSc                     | Department of Psychosis Studies, Institute of Psychiatry, Psychology and Neuroscience, King's College London                                 | London, UK                                      |                                                                |                                                                                                   |
|                                                                              |                   |                              |                         | NIHR Maudsley Biomedical Research Centre, South London and Maudsley NHS Foundation                                                           | London, UK                                      |                                                                |                                                                                                   |
| Cali F                                                                       | Bartholomeusz     |                              | PhD                     | Orygen                                                                                                                                       | Melbourne, VIC, Australia                       |                                                                |                                                                                                   |
|                                                                              |                   |                              |                         | Centre for Youth Mental Health, University of Melbourne                                                                                      | Melbourne, VIC, Australia                       |                                                                |                                                                                                   |
| Michael WL                                                                   | Chee              |                              | MBBS                    | Centre for Sleep and Cognition, Yong Loo Lin School of Medicine, National University of Singapore                                            | Singapore                                       |                                                                |                                                                                                   |
|                                                                              |                   |                              |                         | Centre for Translational Magnetic Resonance Research, Yong Loo Lin School of Medicine, National University of Singapore                      | Singapore                                       |                                                                |                                                                                                   |
| Xiaogang                                                                     | Chen              |                              | MD, PhD                 | National Clinical Research Center for Mental Disorders and Department of Psychiatry, The Second Xiangya Hospital of Central South University | Changsha, China                                 |                                                                |                                                                                                   |
|                                                                              |                   |                              |                         | National Clinical Research Center for Geriatric Disorders, Xiangya Hospital, Central South University                                        | Changsha, China                                 |                                                                |                                                                                                   |
| Rebecca E                                                                    | Cooper            |                              | BBmed(hons)             | Melbourne Neuropsychiatry Centre, Department of Psychiatry, University of Melbourne & Melbourne Health                                       | Melbourne, VIC, Australia                       |                                                                |                                                                                                   |
| Lieuwe                                                                       | de Haan           |                              | MD, PhD                 | Department of Psychiatry, Amsterdam University Medical Centre                                                                                | Amsterdam, The Netherlands                      |                                                                |                                                                                                   |
|                                                                              |                   |                              |                         | Arkin                                                                                                                                        | Amsterdam, The Netherlands                      |                                                                |                                                                                                   |

## Supplemental Online Content: Nonauthor Collaborators

\*First name, last name, and suffix (if applicable) are required and will appear in PubMed.

| *First Name and Middle Initial(s) | *Last Name | *Suffix (eg, Jr, III) | Academic Degrees | Institution                                                                                                                                  | Location (city, state/province, country) | Role or Contribution, eg, chair, principal investigator | Group (if more than 1 Group listed in the byline) and/or Subgroup (eg, Steering Committee) |
|-----------------------------------|------------|-----------------------|------------------|----------------------------------------------------------------------------------------------------------------------------------------------|------------------------------------------|---------------------------------------------------------|--------------------------------------------------------------------------------------------|
| Holly K                           | Hamilton   |                       | PhD              | Department of Psychiatry and Behavioral Sciences, University of California San Francisco                                                     | San Francisco, CA, USA                   |                                                         |                                                                                            |
|                                   |            |                       |                  | San Francisco Veterans Affairs Health Care System                                                                                            | San Francisco, CA, USA                   |                                                         |                                                                                            |
| Ying                              | He         |                       | MD, PhD          | National Clinical Research Center for Mental Disorders and Department of Psychiatry, The Second Xiangya Hospital of Central South University | Changsha, China                          |                                                         |                                                                                            |
| Wenche ten Velden                 | Hegelstad  |                       | PhD              | Faculty of Social Sciences, University of Stavanger                                                                                          | Stavanger, Norway                        |                                                         |                                                                                            |
|                                   |            |                       |                  | TIPS Centre for Clinical Research in Psychosis, Stavanger University Hospital                                                                | Stavanger, Norway                        |                                                         |                                                                                            |
| Leslie E                          | Horton     |                       | PhD              | Department of Psychiatry, University of Pittsburgh                                                                                           | Pittsburgh, PA, USA                      |                                                         |                                                                                            |
| Daniela                           | Hubl       |                       | MD               | Translational Research Center, University Hospital of Psychiatry and Psychotherapy, University of Bern                                       | Bern, Switzerland                        |                                                         |                                                                                            |
| Mallory J                         | Klaunig    |                       | PhD              | Department of Psychology, University of Maryland                                                                                             | College Park, MD, USA                    |                                                         |                                                                                            |
| Alex                              | Koppel     |                       | HBSc             | Department of Pharmacology and Toxicology, University of Toronto                                                                             | Toronto, Canada                          |                                                         |                                                                                            |
| Yoo Bin                           | Kwak       |                       | BA               | Department of Brain and Cognitive Sciences, Seoul National University College of Natural Sciences                                            | Seoul, Republic of Korea                 |                                                         |                                                                                            |
| Pablo                             | León-Ortiz |                       | MD, PhD          | Laboratory of Experimental Psychiatry, Instituto Nacional de Neurología y Neurocirugía                                                       | Mexico City, Mexico                      |                                                         |                                                                                            |
| Rachel L                          | Loewy      |                       | PhD              | Department of Psychiatry and Behavioral Sciences, University of California San Francisco                                                     | San Francisco, CA, USA                   |                                                         |                                                                                            |
| Patrick                           | McGorry    |                       | MD, PhD          | Centre for Youth Mental Health, University of Melbourne                                                                                      | Melbourne, VIC, Australia                |                                                         |                                                                                            |
|                                   |            |                       |                  | Orygen                                                                                                                                       | Melbourne, VIC, Australia                |                                                         |                                                                                            |

## Supplemental Online Content: Nonauthor Collaborators

\*First name, last name, and suffix (if applicable) are required and will appear in PubMed.

| *First Name and Middle Initial(s) | *Last Name | *Suffix (eg, Jr, III) | Academic Degrees | Institution                                                                                                                                                                    | Location (city, state/province, country) | Role or Contribution, eg, chair, principal investigator | Group (if more than 1 Group listed in the byline) and/or Subgroup (eg, Steering Committee) |
|-----------------------------------|------------|-----------------------|------------------|--------------------------------------------------------------------------------------------------------------------------------------------------------------------------------|------------------------------------------|---------------------------------------------------------|--------------------------------------------------------------------------------------------|
| Lijun                             | Ouyang     |                       | MD               | National Clinical Research Center for Mental Disorders and Department of Psychiatry, The Second Xiangya Hospital of Central South University                                   | Changsha, China                          |                                                         |                                                                                            |
|                                   |            |                       |                  | Hunan Key Laboratory of Psychiatry and Mental Health, The Second Xiangya Hospital, Central South University                                                                    | Changsha, China                          |                                                         |                                                                                            |
|                                   |            |                       |                  | National Clinical Research Center for Geriatric Disorders, Xiangya Hospital, Central South University                                                                          | Changsha, China                          |                                                         |                                                                                            |
| Paul E                            | Rasser     |                       | MSc              | Priority Centre for Brain and Mental Health Research, The University of Newcastle                                                                                              | Newcastle, NSW, Australia                |                                                         |                                                                                            |
|                                   |            |                       |                  | Priority Research Centre for Stroke and Brain Injury, The University of Newcastle                                                                                              | Newcastle, NSW, Australia                |                                                         |                                                                                            |
| Franz                             | Resch      |                       | MD               | Clinic for Child and Adolescent Psychiatry, University Hospital of Heidelberg                                                                                                  | Heidelberg, Germany                      |                                                         |                                                                                            |
| Jason                             | Schiffman  |                       | PhD              | Department of Psychological Science, University of California Irvine                                                                                                           | Irvine, CA, USA                          |                                                         |                                                                                            |
|                                   |            |                       |                  | Department of Psychology, University of Maryland                                                                                                                               | College Park, MD, USA                    |                                                         |                                                                                            |
| Mikkel E                          | Sørensen   |                       | MSc              | Centre for Neuropsychiatric Schizophrenia Research (CNSR) & Centre for Clinical Intervention and Neuropsychiatric Schizophrenia Research (CINS), Mental Health Centre Glostrup | Glostrup, Denmark                        |                                                         |                                                                                            |
| Jinsong                           | Tang       |                       | MD, PhD          | Department of Psychiatry, Sir Run Run Shaw Hospital, School of Medicine, Zhejiang University                                                                                   | Hangzhou, China                          |                                                         |                                                                                            |
|                                   |            |                       |                  | Key Laboratory of Medical Neurobiology of Zhejiang Province, School of Medicine, Zhejiang University                                                                           | Hangzhou, China                          |                                                         |                                                                                            |
| Dennis                            | Velakoulis |                       | MD               | Melbourne Neuropsychiatry Centre, Department of Psychiatry, University of Melbourne & Melbourne Health                                                                         | Melbourne, VIC, Australia                |                                                         |                                                                                            |

Supplemental Online Content: Nonauthor Collaborators

\*First name, last name, and suffix (if applicable) are required and will appear in PubMed.

| *First Name and Middle Initial(s) | *Last Name | *Suffix (eg, Jr, III) | Academic Degrees | Institution                                                                                                                                  | Location (city, state/province, country) | Role or Contribution, eg, chair, principal investigator | Group (if more than 1 Group listed in the byline) and/or Subgroup (eg, Steering Committee) |
|-----------------------------------|------------|-----------------------|------------------|----------------------------------------------------------------------------------------------------------------------------------------------|------------------------------------------|---------------------------------------------------------|--------------------------------------------------------------------------------------------|
|                                   |            |                       |                  | Neuropsychiatry, The Royal Melbourne Hospital                                                                                                | Melbourne, VIC, Australia                |                                                         |                                                                                            |
| Sophia                            | Vinogradov |                       | MD               | Department of Psychiatry & Behavioral Sciences, University of Minnesota                                                                      | Minneapolis, MN, USA                     |                                                         |                                                                                            |
| Hidenori                          | Yamasue    |                       | MD, PhD          | Department of Psychiatry, Hamamatsu University School of Medicine                                                                            | Hamamatsu, Japan                         |                                                         |                                                                                            |
| Liu                               | Yuan       |                       | MD               | National Clinical Research Center for Mental Disorders and Department of Psychiatry, The Second Xiangya Hospital of Central South University | Changsha, China                          |                                                         |                                                                                            |
|                                   |            |                       |                  | Hunan Key Laboratory of Psychiatry and Mental Health, The Second Xiangya Hospital, Central South University                                  | Changsha, China                          |                                                         |                                                                                            |
|                                   |            |                       |                  | National Clinical Research Center for Geriatric Disorders, Xiangya Hospital, Central South University                                        | Changsha, China                          |                                                         |                                                                                            |
| Alison R                          | Yung       |                       | PhD              | Centre for Youth Mental Health, University of Melbourne                                                                                      | Melbourne, VIC, Australia                |                                                         |                                                                                            |
|                                   |            |                       |                  | Orygen                                                                                                                                       | Melbourne, VIC, Australia                |                                                         |                                                                                            |
