# Supplementary material for: Normative Modeling of Brain Morphometry in Clinical High Risk for Psychosis
Source: PubMed Central journal article supplement (PMC10568447; doi:10.1001/jamapsychiatry.2023.3850), 2023-10-11
Supplement: jamapsychiatry-e233850-s003.pdf [file jamapsychiatry-e233850-s003.pdf]

## Data Sharing Statement

Haas. Normative Modeling of Brain Morphometry in Clinical High Risk for Psychosis. *JAMA Psychiatry*. Published October 11, 2023. doi:10.1001/jamapsychiatry.2023.3850

### Data

**Data available:** No

### Additional Information

**Explanation for why data not available:** The data used within this paper is based on a pooled analysis using a limited set of anonymized variables that were made available by each participating site. Data requests are considered from members of the ENIGMA Clinical High Risk for Psychosis Working Group (<https://enigma.ini.usc.edu/ongoing/enigma-clinical-high-risk/>), and any researcher with the ability to contribute neuroimaging and/or clinical data of CHR participants are encouraged to join the working group. Please contact the Co-Chairs Maria Jalbrzikowski ([Maria.Jalbrzikowski@childrens.harvard.edu](mailto:Maria.Jalbrzikowski@childrens.harvard.edu)) and Dennis Hernaus ([dennis.hernaus@maastrichtuniversity.nl](mailto:dennis.hernaus@maastrichtuniversity.nl)) of the ENIGMA Clinical High Risk for Psychosis Working Group if you are interested in joining. The normative model used to compute individual-level brain morphometric deviations is openly accessible here: <https://centilebrain.org/#/model>. Code for additional analyses described within this manuscript are available here: <https://github.com/shalailahaas/ENIGMA-CHR-P-Normative-Modeling>.
